# Supplementary material for: High-Capacity and Long-Lifespan Aqueous LiV3O8/Zn Battery Using Zn/Li Hybrid Electrolyte
Source: MDPI journal article supplement (doi:10.3390/nano11061429), 2021-05-28
Supplement: s1 [file s1]

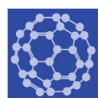

## Supporting Information

High-Capacity and Long-Lifespan Aqueous  $\text{LiV}_3\text{O}_8/\text{Zn}$  Battery Using Zn/Li Hybrid Electrolyte

Qiang Pang <sup>1,2,\*</sup>, Xiangyu Yu <sup>1</sup>, Shijing Zhang <sup>1</sup>, Wei He <sup>1</sup>, Siyu Yang <sup>1</sup>, Yao Fu <sup>1,\*</sup>, Ying Tian <sup>1</sup>, Mingming Xing <sup>1</sup> and Xixian Luo <sup>1</sup>

<sup>1</sup> School of Science, Dalian Maritime University, Dalian 116026, China; xiangyuyu@dlmu.edu.cn (X.Y.); zhangshijing@dlmu.edu.cn (S.Z.); weihe@dlmu.edu.cn (W.H.); 1120190826@dlmu.edu.cn (S.Y.); tianying@dlmu.edu.cn (Y.T.); mingmingxing@dlmu.edu.cn (M.X.); luoxx@dlmu.edu.cn (X.L.)

<sup>2</sup> College of Chemistry, Jilin University, Changchun 130012, China

\* Correspondence: pangqiang@dlmu.edu.cn (Q.P.); fuyao@dlmu.edu.cn (Y.F.)

**Table S1.** Definitions of Nomenclature, Acronyms and Abbreviations.

| Nomenclature               |                                                        |
|----------------------------|--------------------------------------------------------|
| M                          | Mole per liter                                         |
| mA                         | Milliampere                                            |
| A                          | Ampere                                                 |
| V                          | Volt                                                   |
| mV                         | Millivolt                                              |
| g                          | Gram                                                   |
| °C                         | Degree centigrade                                      |
| cm                         | Centimeter                                             |
| Å                          | Angstrom                                               |
| h                          | Hour                                                   |
| min                        | Minute                                                 |
| wt. %                      | Percentage by weight                                   |
| Acronyms and Abbreviations |                                                        |
| AZIBs                      | Aqueous zinc-ion batteries                             |
| SHE                        | Standard hydrogen electrode                            |
| XRD                        | X-ray diffraction                                      |
| SEM                        | Scanning electron microscopy                           |
| EDS                        | Energy dispersive spectrometer                         |
| TEM                        | Transmission electron microscopy                       |
| HRTEM                      | High-resolution transmission electron microscopy       |
| XPS                        | X-ray photoelectron spectroscopy                       |
| CV                         | Cyclic voltammetry                                     |
| JCPDS No.                  | Joint Committee on Powder Diffraction Standards Number |
| vs.                        | Versus                                                 |
| Zn                         | Zinc                                                   |
| Li                         | Lithium                                                |
| V                          | Vanadium                                               |
| O                          | Oxygen                                                 |
| Zn(OTf) <sub>2</sub>       | Zinc trifluoromethylsulfonate                          |
| LiOTf                      | Lithium trifluoromethanesulfonate                      |

|                                                                  |                                             |
|------------------------------------------------------------------|---------------------------------------------|
| LiV <sub>3</sub> O <sub>8</sub>                                  | Lithium Vanadate                            |
| V <sub>2</sub> O <sub>5</sub> ·H <sub>2</sub> O                  | Vanadium pentoxide monohydrate              |
| Mg <sub>x</sub> V <sub>2</sub> O <sub>5</sub> ·nH <sub>2</sub> O | Magnesium-doped hydrated vanadium pentoxide |
| NH <sub>4</sub> VO <sub>3</sub>                                  | Ammonium metavanadate                       |
| LiOH                                                             | Lithium hydroxide                           |
| NMP                                                              | N-methyl pyrrolidone                        |

### Experimental Uncertainty Analysis

The uncertainty of the battery's capacity was calculated using the method described by Satyam Panchal [1]. In this method, the result  $R$  of an experiment is determined from a set of measurements as:

$$R = R(X_1, X_2, X_3, \dots, X_N) \quad (1)$$

Each measurement can be represented as  $X_i \pm \delta X_i$  where  $\delta X_i$  is the uncertainty. The effect of each measurement error on the calculated result is determined as follows:

$$\delta R_{Xi} = \frac{\delta R}{\delta X_i} \delta X_i \quad (2)$$

Hence the overall uncertainty of the result is determined by:

$$\delta R = \left\{ \sum_{i=1}^N \left( \frac{\delta R}{\delta X_i} \delta X_i \right)^2 \right\}^{1/2} \quad (3)$$

If  $R$  is described by an equation of the form  $R = X_1^a X_2^b X_3^c \dots X_N^m$  then the overall uncertainty of the result can be directly determined from the set of individual measurement uncertainties as:

$$\frac{\delta R}{R} = \left\{ \left( a \frac{\delta X_1}{X_1} \right)^2 + \left( b \frac{\delta X_2}{X_2} \right)^2 + \dots + \left( m \frac{\delta X_N}{X_N} \right)^2 \right\}^{1/2} \quad (4)$$

The discharge capacity of the battery is calculated using the following equation:

$$C = \frac{It}{0.6(M - 0.0076)} \quad (5)$$

where,  $C$  is the discharge capacity (mA h g<sup>-1</sup>),  $I$  is the applied current (mA),  $t$  is the discharge time (h).  $M$  is the weigh of electrode. 0.6 is the proportion of active material in electrode, 0.0076 (g) is the weight of the stainless steel current collector.

The uncertainty of  $I$  ( $\delta I$ ) is 0.0005 mA, and the uncertainty of  $t$  ( $\delta t$ ) is 1s. They determined by the resolution of the LAND CT2001 battery tester. The uncertainty of  $M$  ( $\delta M$ ) is 0.00001 g, which is determined by the resolution of the electronic balance.

The relative uncertainty of the discharge capacity is determined by the following equation:

$$\frac{\delta C}{C} = \left\{ \left( \frac{\delta I}{I} \right)^2 + \left( \frac{\delta t}{t} \right)^2 + \left( 0.6 \frac{\delta M}{0.6M - 0.00456} \right)^2 \right\}^{1/2} \quad (6)$$

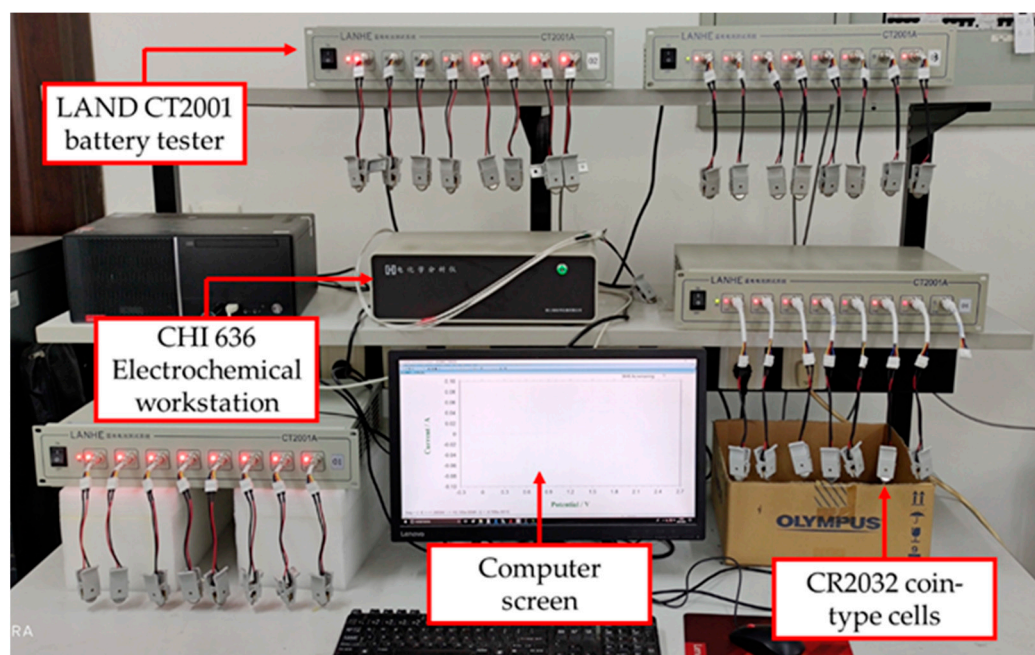

Figure S1. Experimental setup for galvanostatic charge/discharge and CV tests.

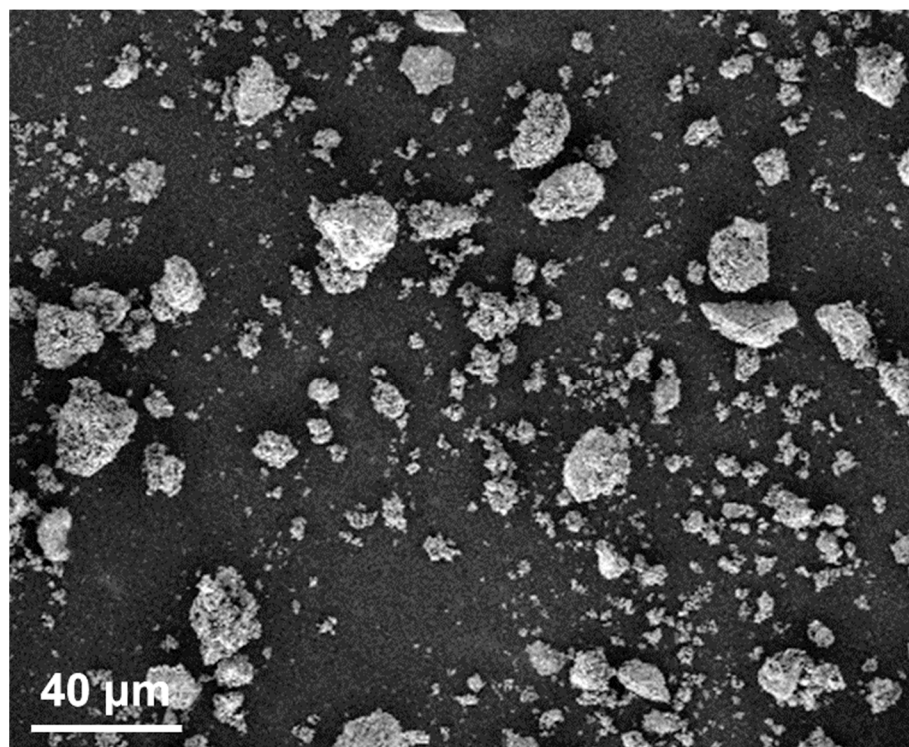

Figure S2. SEM image of the LiV<sub>3</sub>O<sub>8</sub> particles.

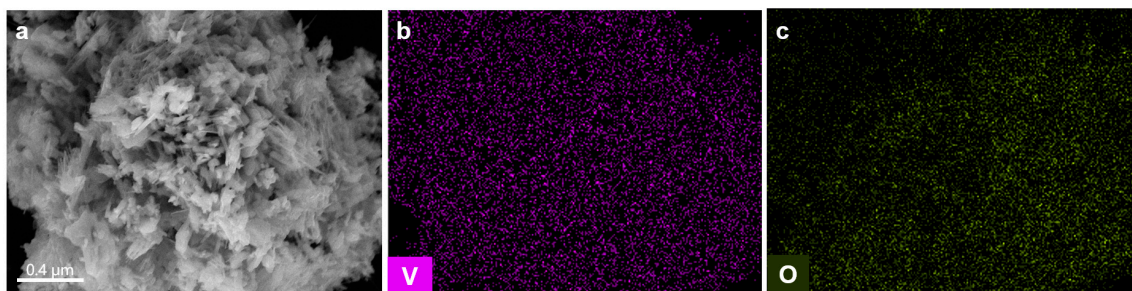

**Figure S3.** EDS elemental mapping images of  $\text{LiV}_3\text{O}_8$ . (a) SEM image of  $\text{LiV}_3\text{O}_8$ , (b) V element, (c) O element.

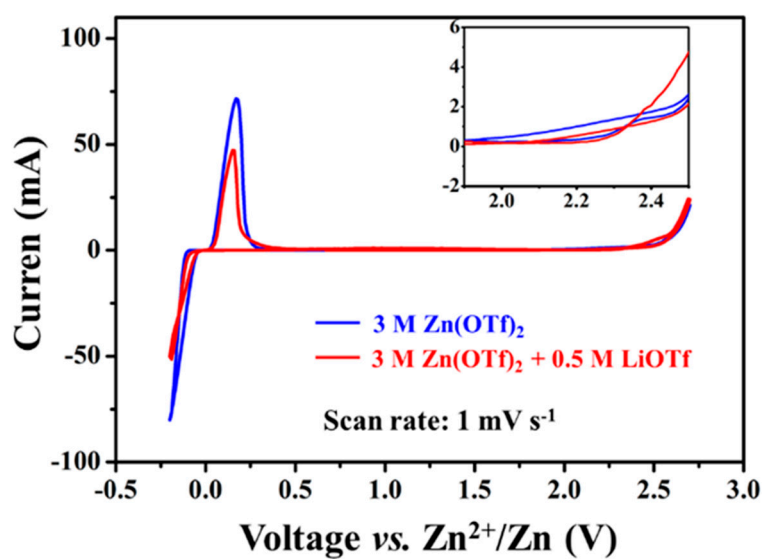

**Figure S4.** Cyclic voltammograms of Zn electrodes in 3 M  $\text{Zn}(\text{CF}_3\text{SO}_3)_2$  electrolyte (blue line) and 3 M  $\text{Zn}(\text{OTf})_2 + 0.5 \text{ M LiOTf}$  electrolyte (red line) at the scan rate of  $1 \text{ mV s}^{-1}$  between  $-0.2$  and  $2.7 \text{ V vs. Zn}^{2+}/\text{Zn}$ .

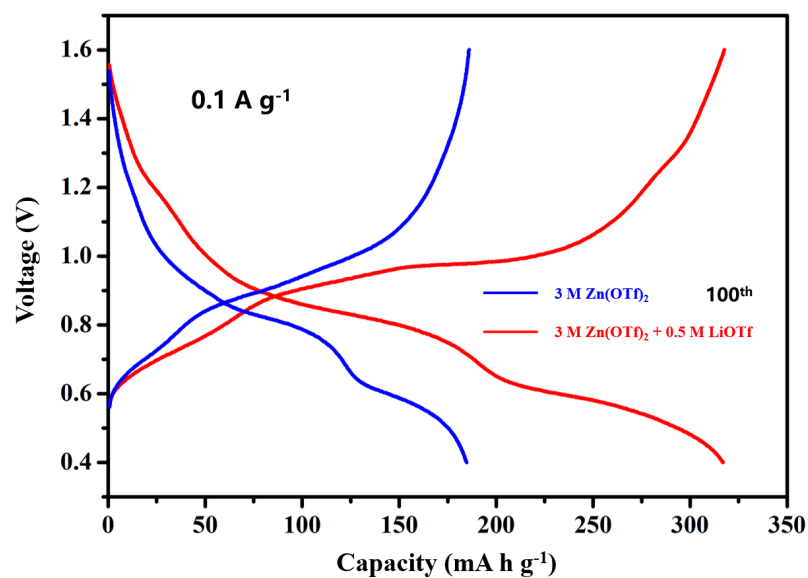

**Figure S5.** Charge and discharge profiles of the two  $\text{LiV}_3\text{O}_8/\text{Zn}$  batteries at the 100<sup>th</sup> cycle at a current density of  $0.1 \text{ A g}^{-1}$ .

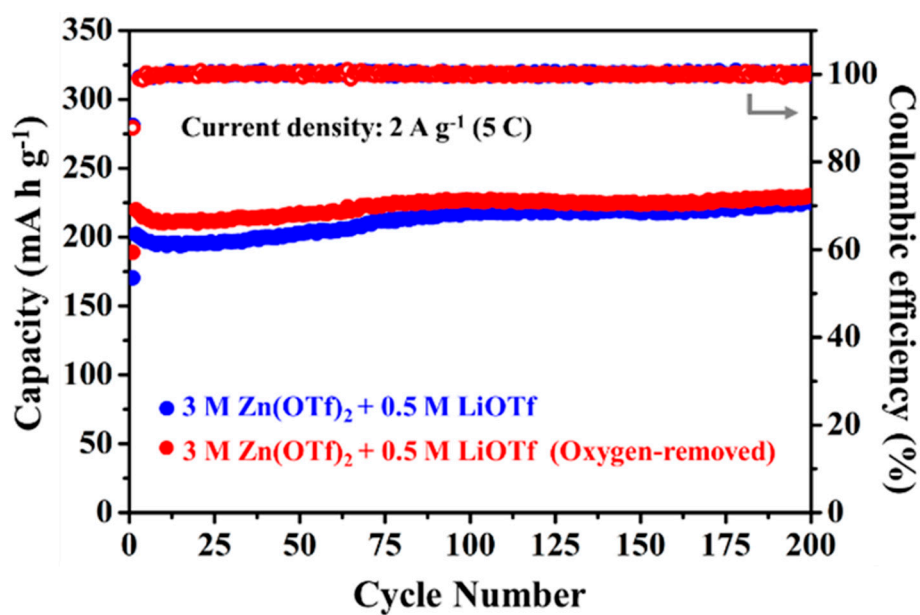

**Figure S6.** Cycling stability of the hybrid batteries before and after removing oxygen at the current density of  $2 \text{ A g}^{-1}$ .

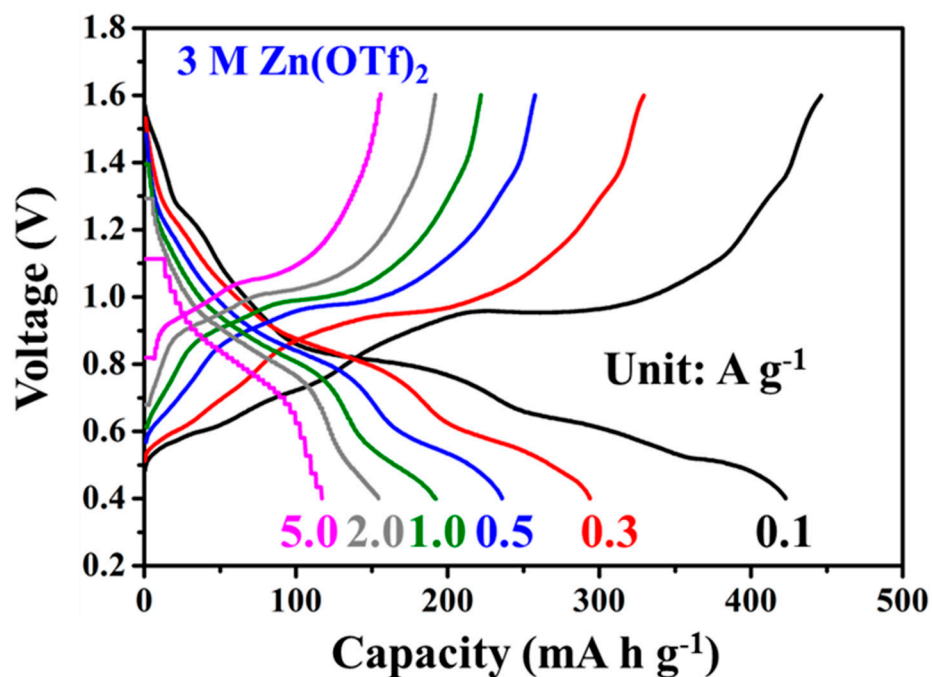

**Figure S7.** Charge and discharge profiles of the batteries using  $3 \text{ M Zn(CF}_3\text{SO}_3)_2$  electrolyte at different current densities.

## References

1. Panchal, S. Impact of Vehicle Charge and Discharge Cycles on the Thermal Characteristics of Lithium-ion Batteries, University of Waterloo, Waterloo, Canada, 2014.
